# Supplementary material
Source: PubMed Central journal article supplement (PMC3356655)
Supplement: 1114718109_pnas.201114718SI.pdf [file 1114718109_pnas.201114718SI.pdf]

# Supporting Information

Lee et al. 10.1073/pnas.1114718109

## SI Materials and Methods

**Tumor Pathology.** Whole brains within the skull were fixed in 10% formalin, decalcified with Formical-4 (Decal Chemical), and embedded in paraffin. Tissues were cut into 4- $\mu$ m sections in the horizontal plane and H&E stained to generate computerized 3D renderings of the tumors. Sections were scanned by using a TissueFax (TissueGnostics) then stacked and aligned with the StackReg function of ImageJ, and 3D models were rendered with Imaris.

**MRI and Chlorotoxin:Cy5.5 Imaging Analysis.** MRI was performed by using a 3-T MRI system (Achieva; Philips) and a custom mouse head coil. Serial MRI scans were performed under halothane anesthesia with a 35-min coronal high-resolution, T2-weighted sequence [echo time (TE) = 110 ms, repetition time (TR) = 2,000 ms, bandwidth = 212, number of excitations (NEX) or signal averages = 2, pixels in-plane =  $256 \times 256$ , slice thickness = 320  $\mu$ m, interslice gap = 160  $\mu$ m]. Digital Imaging and Communications in Medicine (DICOM) images were exported from the MRI scanner to BioScribe and then imported into ITK-SNAP (<http://www.itksnap.org>). Chlorotoxin:Cy5.5 in vivo imaging was carried out as previously described (1).

**Gene Amplification Analysis.** *Gli2* amplification was assessed by real-time PCR using a SYBR Green PCR kit (Qiagen). Tumors were snap-frozen and analyzed for *Gli2* with three different primer sets and for *Gapdh* as normalization control. Genomic DNA from four mice of different genomic backgrounds was used as controls for each assay along with a no-template control. Four technical replicates were performed.

**Western Blot Analysis.** Tumor samples were homogenized in RIPA lysis buffer that included protease inhibitors. Equal amounts of proteins were loaded onto a 4–12% SDS/PAGE gel, transferred onto PVDF membrane, and probed with the antibody of interest: P-glycoprotein (Pgp; C219, 1:100; Covance).

**Gene Expression Analysis.** Total RNA was extracted with the RNeasy Kit (Qiagen). For quantitative RT-PCR analysis, cDNA synthesis was performed with the TaqMan Reverse Transcription kit (ABI) and TaqMan Master Mix and the 7300HT System (ABI). TaqMan primers for mouse *Gli1* and *Gapdh* were used. All conditions were run in triplicate and normalized to *Gapdh* controls.

For whole-genome expression analysis, RNA was hybridized to mouse-specific (MouseWG-6 v2.0) expression BeadChips (Illumina). Probe intensities were normalized with the Illumina-specific Lumi Bioconductor R package. Functional gene-in-

teraction network analysis was performed by using Ingenuity Pathways Analysis (Ingenuity Systems).

**Array-Comparative Genomic Hybridization.** Genomic DNA was labeled and hybridized to Mouse Genome CGH Microarray 244K kit (Agilent) using WT littermate genomic DNA as a reference. Arrays were scanned with an Agilent microarray scanner, and image analysis was performed with Agilent Feature Extraction software.

**Gli-Luciferase Reporter Assay.** Gli-luciferase reporter assays were performed as previously described (2).

**Pgp Functional Assay by Flow Cytometry.** Pgp functionality was assessed by measuring fluorescent dye efflux of calcein-AM (Molecular Probes) with or without the Pgp inhibitor verapamil. First,  $5 \times 10^5$  cerebellar *Patched1*-null (*Ptc*<sup>C/C</sup>) tumor cells were incubated with or without 10  $\mu$ M verapamil for 1 h at 37 °C, then with 1  $\mu$ M calcein-AM for 30 min at 37 °C. Cells were washed and resuspended in PBS and analyzed for calcein fluorescence by flow cytometry (excitation: 495 nm, emission: 515 nm). Debris was eliminated by gating on forward versus side scatter. The function of Pgp is expressed as the mean percentage of fluorescence intensity of gated FITC<sup>+</sup> cells. The assays were performed in triplicate.

**Statistical Considerations.** Studies were designed to detect differences in event rates that approximately corresponded to a doubling of median improvement in survival of 3 wk with 90% power based on simulated power experiments. These estimates were made by using a two-sided log-rank test at  $P < 0.05$  significance level. Survival analyses used animal death times and censoring times when animals were killed at ~6 wk or as otherwise stated. Survival curves were plotted with the Kaplan–Meier method and compared by using a two-sided log-rank test. The Bonferroni test was used to correct multiple comparisons. Statistical analyses were performed in R statistical systems (<http://www.r-project.org>).

**Immunohistochemical Staining.** Tissues were cut into 4- $\mu$ m sections and immunostained with the following antibodies: anti-Ki67 (1:1,000; Novocastra) and anti-Cleaved Caspase 3 (1:50; Biocare Medical). Sections were scanned with a TissueFax microscope (TissueGnostics). For Ki67 and Caspase 3 staining quantification, positive staining was quantified with National Institutes of Health image analysis software, Image J, and reported as percentage area of staining in the cerebellum.

1. Veiseth M, et al. (2007) Tumor paint: A chlorotoxin:Cy5.5 bioconjugate for intraoperative visualization of cancer foci. *Cancer Res* 67:6882–6888.

2. Yauch RL, et al. (2009) *Smoothed* mutation confers resistance to a Hedgehog pathway inhibitor in medulloblastoma. *Science* 326:572–574.

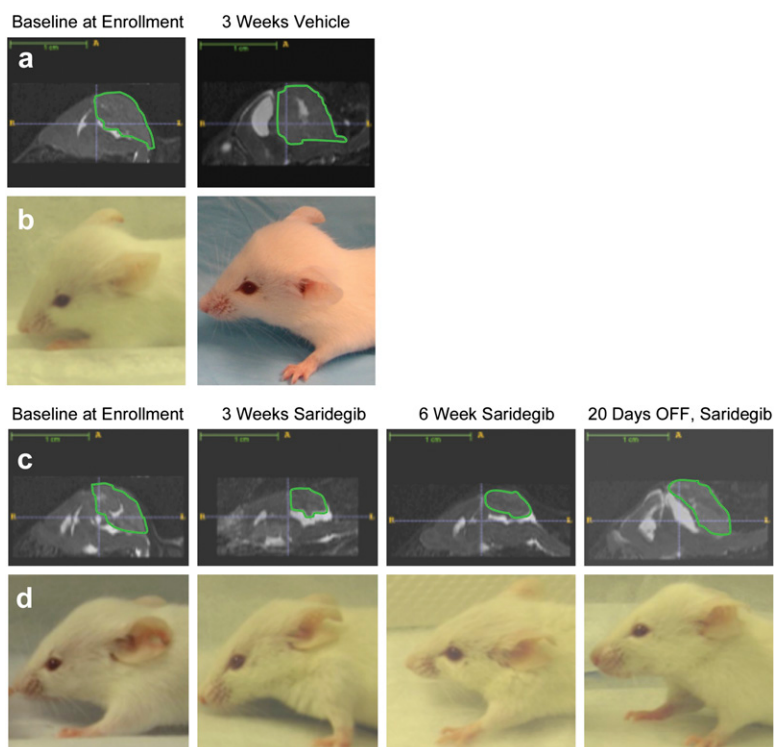

**Fig. S1.** Monitoring tumor response via MRI. (A and C) Representative MRI scans in the sagittal plane from vehicle-treated (A) or saridegib-treated (C) Ptc<sup>C/C</sup> mice are shown at enrollment, after 3 wk of daily saridegib treatment, after 6 wk of daily saridegib treatment, and after drug withdrawal. T2-weighted axial images were acquired at 3 T with a Philips MRI system and a custom mouse-head coil. Control mice were imaged at enrollment and after 3 wk on daily vehicle treatment, although no vehicle-treated mice survived until the 6-wk imaging time point. (B and D) Live animal images are shown in parallel with the MRI scans for vehicle-treated (B) and saridegib-treated (D) mice.

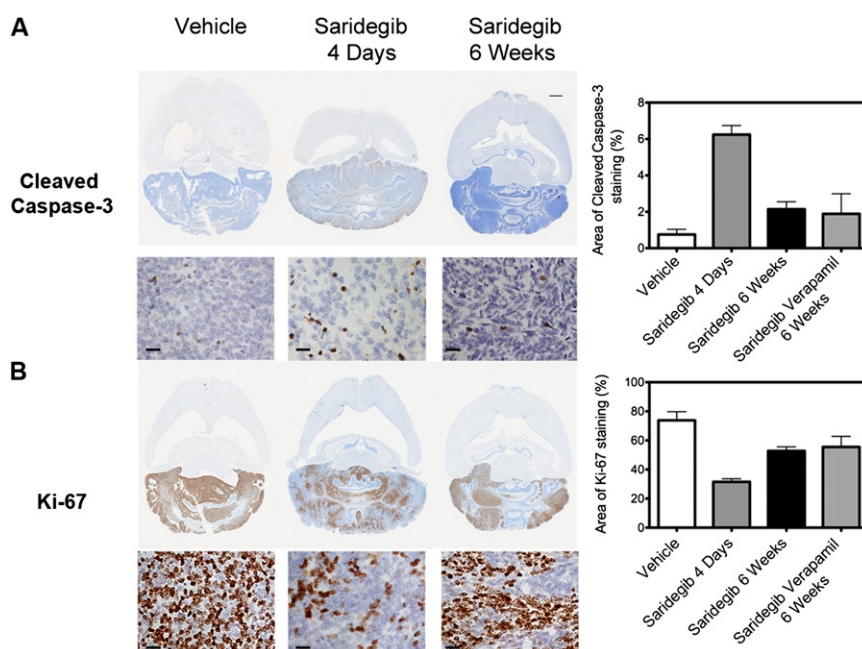

**Fig. S2.** Effect of saridegib on proliferation and apoptosis. Representative examples of immunohistochemical analysis of Ptc<sup>CC</sup> tumors stained with Cleaved Caspase 3 (A) and Ki67 (B) antibodies are shown. Percentage area of active Caspase 3 and Ki67 were quantified with Image J. Compared with vehicle-treated controls, mice treated with the saridegib (20 mg/kg) show reduced expression of Ki67 and increased Cleaved Caspase 3 staining after 4 d of treatment. The effect of the drug on apoptosis and proliferation was reduced after 6 wk of daily therapy. Verapamil and saridegib combination therapy resulted in similar apoptotic and proliferative responses compared with saridegib alone. (Scale bars: *Upper*, 1 mm; *Lower*, 50  $\mu$ m.) Individual data points represent the means  $\pm$  SEM of three independent samples from each treatment.



**Table S2. Top 10 networks and the associated functional categories of the genes significantly altered in saridegib-treated Ptc<sup>C/C</sup> tumors identified by Ingenuity Pathway Analysis**

| Category                                      | <i>P</i>                                        | No. of molecules | Genes up-regulated by more than twofold                                                                                                     | Genes down-regulated by more than twofold |
|-----------------------------------------------|-------------------------------------------------|------------------|---------------------------------------------------------------------------------------------------------------------------------------------|-------------------------------------------|
| Cancer                                        | $2.19 \times 10^{-27}$ – $1.04 \times 10^{-03}$ | 173              | MT1E, ANXA5, TIMP1, IFITM3, PLEKHB1, EFF1A2                                                                                                 | CHRNA3, MTDH                              |
| Neurological disease                          | $6.03 \times 10^{-25}$ – $8.09 \times 10^{-04}$ | 159              | C3, SPP1, PDGDS, VSNL1, ENO2, PVALB, OTX2, CHI3L1, ITPR1, PCP2, LCN2, THY1, DCN, SLC24A2, C4B, MBP, IGFBP5, ATP2A3, HSPB8                   | CHRNA3, MTDH                              |
| Skeletal and muscular disorders               | $7.15 \times 10^{-25}$ – $1.24 \times 10^{-03}$ | 154              | C3, SPP1, PDGDS, VSNL1, ENO2, PVALB, CHI3L1, ITPR1, LCN2, THY1, C4B, MBP, IGFBP5, ATP2A3, HSPB8                                             | CHRNA3, MTDH                              |
| Cell death                                    | $1.27 \times 10^{-19}$ – $1.29 \times 10^{-03}$ | 140              | LGALS3, C3, HBB, HBA1/HBA2, SPP1, PTGDS, CALB2, OTX2, CHI3L1, ITPR1, LCN2, Lyz1/Lyz2, THY1, DCN, MBP, IGFBP5, GADD45G, HSPB8, PCSK9, GFAP   | MTDH                                      |
| Cellular movement                             | $9.06 \times 10^{-15}$ – $1.26 \times 10^{-03}$ | 96               | LGALS3, C3, SPP1, VSNL1, CHI3L1, ITPR1, LCN2, Lyz1/Lyz2, THY1, DCN, C4B, IGFBP5, RASGRF1, GFAP                                              | —                                         |
| Cellular growth and proliferation             | $2.13 \times 10^{-14}$ – $1.08 \times 10^{-03}$ | 136              | LGALS3, C3, SPP1, GPNMB, PTGDS, OTX2, ITPR1, LCN2, THY1, DCN, MBP, IGFBP5, GADD45G, HSPB8, RASGRF1, GAD1                                    | —                                         |
| Tissue development                            | $1.18 \times 10^{-13}$ – $1.04 \times 10^{-03}$ | 126              | LGALS3, C3, HBB, HBA1/HBA2, SPP1, PTGDS, VSNL1, OTX2, KND1, ITPR1, LCN2, ATP1B1, THY1, DCN, C4B, MBP, IGFBP5, GADD45G, RASGRP1, PCSK9, GFAP | CHRNA3                                    |
| Nervous system development and function       | $2.55 \times 10^{-11}$ – $1.26 \times 10^{-03}$ | 96               | C3, HBA1/HBA2, VSNL1, OTX2, CHI3L1, KND1, ITPR1, ATP1B1, THY1, SLC24A2, MBP, RASGRP1, PCSK9, GFAP                                           | CHRNA3                                    |
| Hematological system development and function | $2.46 \times 10^{-10}$ – $1.24 \times 10^{-03}$ | 89               | LGALS3, C3, HBB, HBA1/HBA2, SPP1, PTGDS, CHI3L1, LCN2, Lyz1/Lyz2, THY1, DCN, C4B, MBP, GADD45G, HSPB8, GFAP, GJA1                           | —                                         |
| Immune cell trafficking                       | $2.46 \times 10^{-10}$ – $1.24 \times 10^{-03}$ | 64               | LGALS3, C3, SPP1, PTGDS, CHI3L1, LCN2, Lyz1/Lyz2, THY1, DCN, C4B, MBP, HSPB8, GFAP, ANXA5, NBL1, TIMP1                                      | —                                         |

Genes from the dataset that met the log-ratio cutoff of  $\geq |0.5|$  and  $P < 0.05$  were considered for the analysis.

**Table S3. Top genes differentially expressed in saridegib-treated Ptc<sup>C/C</sup> tumors**

| Symbol                   | Entrez gene name                                  | Log ratio | <i>P</i>               |
|--------------------------|---------------------------------------------------|-----------|------------------------|
| Log ratio up-regulated   |                                                   |           |                        |
| LGALS3                   | Lectin, galactoside-binding, soluble, 3           | 2.232     | $1.56 \times 10^{-16}$ |
| C3                       | Complement component 3                            | 2.072     | $6.61 \times 10^{-16}$ |
| HBB                      | Hemoglobin, $\beta$                               | 2.000     | $6.62 \times 10^{-09}$ |
| HBA1/HBA2                | Hemoglobin, $\alpha 1$                            | 1.741     | $2.07 \times 10^{-08}$ |
| SPP1                     | Secreted phosphoprotein 1                         | 1.736     | $3.12 \times 10^{-10}$ |
| GPNMB                    | Glycoprotein (transmembrane) NMB                  | 1.705     | $1.34 \times 10^{-12}$ |
| PTGDS                    | Prostaglandin D2 synthase 21 kDa (brain)          | 1.687     | $6.73 \times 10^{-13}$ |
| CALB2                    | Calbindin 2                                       | 1.612     | $7.28 \times 10^{-13}$ |
| VSNL1                    | Visinin-like 1                                    | 1.535     | $1.98 \times 10^{-13}$ |
| ITIH3                    | Inter- $\alpha$ -trypsin inhibitor heavy chain H3 | 1.529     | $4.69 \times 10^{-15}$ |
| ENO2                     | Enolase 2 ( $\gamma$ , neuronal)                  | 1.520     | $2.95 \times 10^{-13}$ |
| PVALB                    | Parvalbumin                                       | 1.477     | $7.28 \times 10^{-13}$ |
| OTX2                     | Orthodenticle homeobox 2                          | 1.460     | $3.86 \times 10^{-08}$ |
| Log ratio down-regulated |                                                   |           |                        |
| RPRML                    | Reprimo-like                                      | −2.173    | $5.42 \times 10^{-19}$ |
| MAK16                    | MAK16 homolog ( <i>Saccharomyces cerevisiae</i> ) | −1.481    | $3.60 \times 10^{-11}$ |
| THAP4                    | THAP domain-containing 4                          | −1.081    | $6.54 \times 10^{-08}$ |
| CHRNA3                   | Cholinergic receptor, nicotinic, $\alpha 3$       | −1.071    | $1.08 \times 10^{-08}$ |
| MTDH                     | Metadherin                                        | −1.055    | $1.39 \times 10^{-07}$ |
| MAP2                     | Microtubule-associated protein 2                  | −0.953    | $8.11 \times 10^{-06}$ |
| MCM6                     | Minichromosome maintenance complex component 6    | −0.937    | $1.42 \times 10^{-06}$ |
| GSTO1                    | GST $\omega 1$                                    | −0.911    | $3.43 \times 10^{-07}$ |
| SFRP1                    | Secreted frizzled-related protein 1               | −0.868    | $1.16 \times 10^{-05}$ |
| ISLR2                    | Ig superfamily containing leucine-rich repeat 2   | −0.830    | $3.87 \times 10^{-03}$ |
| OTX1                     | Orthodenticle homeobox 1                          | −0.820    | $9.15 \times 10^{-05}$ |

A cutoff of log ratio  $\geq |0.5|$  and  $P \leq 0.05$  were used to define focus genes in the network analysis.
